# Supplementary material for: Objectively recorded physical activity in pregnancy and postpartum in a multi-ethnic cohort: association with access to recreational areas in the neighbourhood
Source: PubMed Central journal article supplement (PMC4936091; doi:10.1186/s12966-016-0401-y), 2016-07-07
Supplement: 12966_2016_401_MOESM1_ESM.pdf [file 12966_2016_401_MOESM1_ESM.pdf]

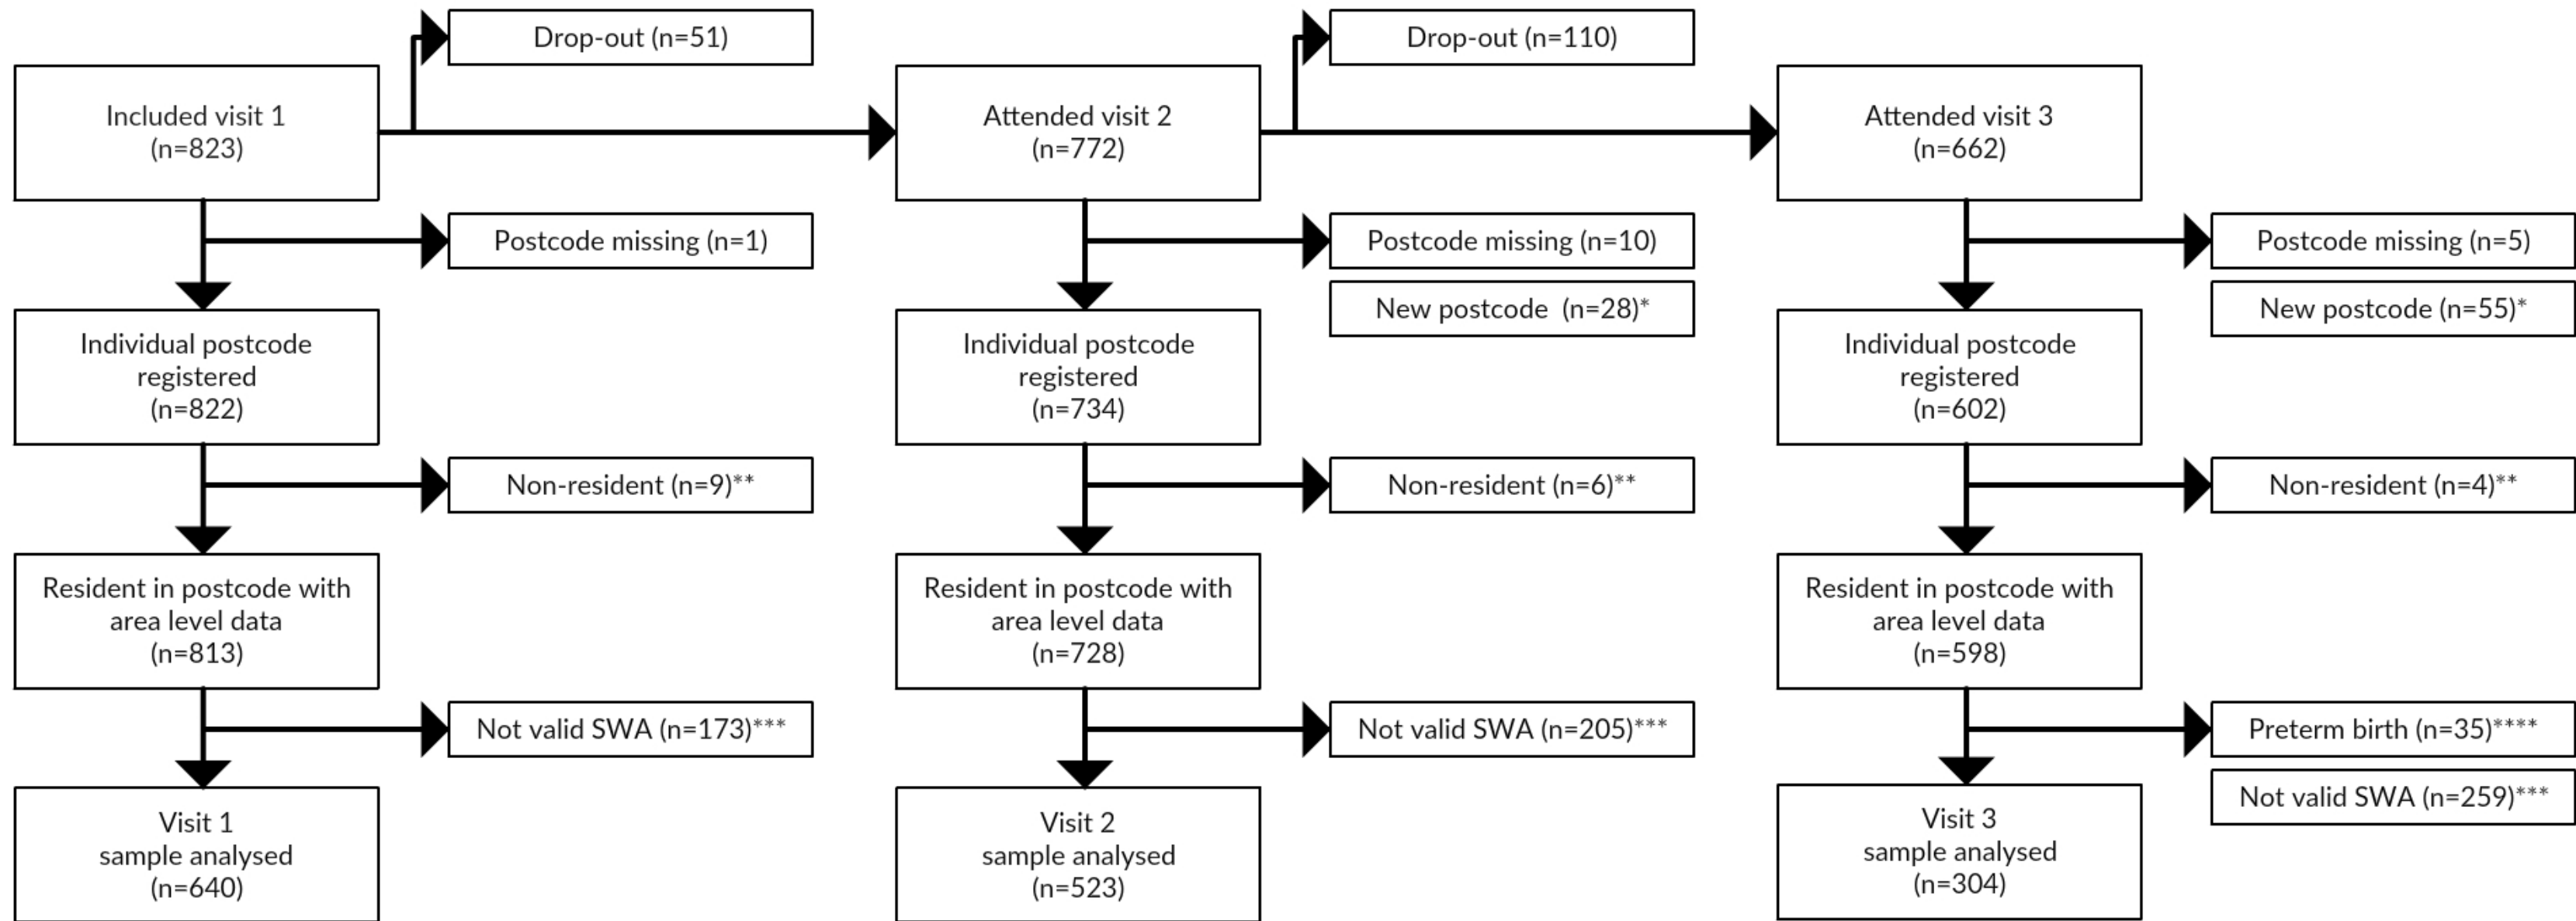

\*Excluded if postcode not identical with postcode at visit 1

\*\*Excluded if not resident within a postcode with available area level data

\*\*\*Excluded if <2 days of at least 19.2 hr SWA weartime at visit

\*\*\*\*Preterm birth if <gestational week 37
