# Supplementary material for: Objectively recorded physical activity in pregnancy and postpartum in a multi-ethnic cohort: association with access to recreational areas in the neighbourhood
Source: PubMed Central journal article supplement (PMC4936091; doi:10.1186/s12966-016-0401-y), 2016-07-07
Supplement: 12966_2016_401_MOESM3_ESM.pdf [file 12966_2016_401_MOESM3_ESM.pdf]

Additional file 3: Median MVPA minutes/day with 25<sup>th</sup>-75<sup>th</sup> percentile at time points 1-3

|                                      | Time-point 1<br>(early pregnancy) |              | Time-point 2<br>(mid-pregnancy) |              | Time-point 3<br>(post-partum) |               |
|--------------------------------------|-----------------------------------|--------------|---------------------------------|--------------|-------------------------------|---------------|
|                                      | Median                            | P25-P75      | Median                          | P25-P75      | Median                        | P25-P75       |
| <b>Objective access</b>              |                                   |              |                                 |              |                               |               |
| Limited                              | 8.0                               | (2.5 - 26.0) | 4.0                             | (0.0 - 14.7) | 12.5                          | (3.7 - 23.3)  |
| Good                                 | 14.5                              | (4.3 - 33.3) | 9.2                             | (2.5 - 22.0) | 19.5                          | (5.8 - 48.0)  |
| <b>Perceived access</b>              |                                   |              |                                 |              |                               |               |
| Low perception                       | 9.5                               | (3.3 - 25.5) | 7.4                             | (0.0 - 17.0) | 16.4                          | (4.0 - 40.8)  |
| High perception                      | 16.8                              | (5.3 - 35.0) | 10.3                            | (2.8 - 24.5) | 20.6                          | (7.0 - 48.5)  |
| <b>Ethnicity</b>                     |                                   |              |                                 |              |                               |               |
| Western                              | 20.3                              | (7.8 - 37.0) | 11.5                            | (3.7 - 26.0) | 28.5                          | (12.8 - 61.3) |
| South Asian                          | 8.8                               | (2.8 - 19.0) | 4.8                             | (0.0 - 17.0) | 6.4                           | (0.0 - 23.0)  |
| Middle Eastern                       | 9.8                               | (2.8 - 25.3) | 5.3                             | (0.0 - 13.7) | 5.8                           | (0.0 - 21.5)  |
| Other                                | 10.4                              | (2.7 - 28.3) | 8.3                             | (0.0 - 18.3) | 12.0                          | (3.8 - 26.0)  |
| <b>Completed education</b>           |                                   |              |                                 |              |                               |               |
| University/collected                 | 18.9                              | (6.3 - 36.5) | 11.7                            | (3.3 - 25.3) | 23.7                          | (8.5 - 48.4)  |
| 10-12 years education                | 10.5                              | (3.3 - 27.7) | 5.5                             | (0.0 - 15.5) | 18.0                          | (5.5 - 42.0)  |
| <10 years education                  | 8.3                               | (1.8 - 31.8) | 6.8                             | (0.0 - 16.7) | 5.0                           | (0.0 - 16.5)  |
| <b>Occupation</b>                    |                                   |              |                                 |              |                               |               |
| Manager/degree occupations           | 21.6                              | (8.4 - 40.6) | 13.4                            | (4.5 - 26.2) | 26.3                          | (11.3 - 54.7) |
| Clerical/care occupations            | 10.8                              | (3.3 - 25.3) | 7.5                             | (0.0 - 17.0) | 17.7                          | (6.0 - 37.7)  |
| Elementary occupations or homemakers | 9.2                               | (2.5 - 25.8) | 4.0                             | (0.0 - 15.4) | 6.8                           | (0.0 - 27.7)  |
| <b>Parity</b>                        |                                   |              |                                 |              |                               |               |
| Nullipara                            | 15.6                              | (5.0 - 36.3) | 11.0                            | (1.8 - 24.8) | 23.0                          | (7.2 - 56.7)  |
| Uni/multipara                        | 12.7                              | (3.3 - 27.7) | 8.0                             | (2.0 - 17.5) | 15.5                          | (4.0 - 37.0)  |
| <b>Season</b>                        |                                   |              |                                 |              |                               |               |
| Winter                               | 12.5                              | (2.8 - 30.5) | 6.5                             | (0.0 - 14.9) | 15.3                          | (5.0 - 31.0)  |
| Spring                               | 14.5                              | (5.0 - 33.0) | 9.2                             | (3.0 - 22.3) | 20.3                          | (6.8 - 59.7)  |
| Summer                               | 14.2                              | (5.5 - 35.0) | 12.0                            | (2.8 - 27.7) | 17.7                          | (5.8 - 43.3)  |
| Autumn                               | 12.8                              | (3.7 - 31.1) | 7.2                             | (0.0 - 18.3) | 22.0                          | (4.6 - 46.5)  |
