# Supplementary material for: Objectively recorded physical activity in pregnancy and postpartum in a multi-ethnic cohort: association with access to recreational areas in the neighbourhood
Source: PubMed Central journal article supplement (PMC4936091; doi:10.1186/s12966-016-0401-y), 2016-07-07
Supplement: 12966_2016_401_MOESM4_ESM.pdf [file 12966_2016_401_MOESM4_ESM.pdf]

**Additional file 4: Associations between access to neighbourhood recreational areas and moderate-to-vigorous intensity physical activity (minutes/day) including all co-variates**

|                                                                     | Model 1 <sup>a</sup> |               | Model 2 <sup>a</sup> |               | Model 3 <sup>a</sup> |               |
|---------------------------------------------------------------------|----------------------|---------------|----------------------|---------------|----------------------|---------------|
|                                                                     | $\beta$              | 95% CI        | $\beta$              | 95% CI        | $\beta$              | 95% CI        |
| <i>Fixed effects</i>                                                |                      |               |                      |               |                      |               |
| <b>Objective access to recreational areas (ref: limited access)</b> |                      |               |                      |               |                      |               |
| Good access                                                         | 9.14**               | 2.66, 15.62   |                      |               | 9.06**               | 2.39, 15.74   |
| <b>Perceived access to recreational areas (ref: Low perception)</b> |                      |               |                      |               |                      |               |
| High perception                                                     |                      |               | 4.75*                | 0.68, 8.82    | 4.40*                | 0.34, 8.45    |
| <b>Time point (ref: Early pregnancy)</b>                            |                      |               |                      |               |                      |               |
| Mid-pregnancy                                                       | -8.15**              | -10.94, -5.36 | -8.28**              | -11.16, -5.40 | -8.23**              | -11.11, -5.36 |
| Post-partum                                                         | 7.04**               | 3.65, 10.43   | 7.49**               | 4.01, 10.98   | 7.51**               | 4.03, 11.00   |
| <b>Gestational-/post-partum week (time-point mean-centred)</b>      | 0.09                 | -0.47, 0.66   | 0.09                 | -0.50, 0.68   | 0.10                 | -0.48, 0.69   |
| <b>Socio-economic position</b>                                      | 2.44*                | 0.18, 4.70    | 2.85*                | 0.48, 5.21    | 2.89*                | 0.53, 5.24    |
| <b>Ethnicity (ref: Western)</b>                                     |                      |               |                      |               |                      |               |
| South Asian                                                         | -9.72**              | -14.88, -4.56 | -10.00**             | -15.32, -4.68 | -10.07**             | -15.34, -4.79 |
| Middle Eastern                                                      | -6.84**              | -13.06, -0.62 | -5.26                | -11.66, 1.15  | -5.43                | -11.80, 0.94  |
| Other ethnicity                                                     | -6.99*               | -12.54, -1.44 | -6.64*               | -12.36, -0.91 | -6.32*               | -12.02, -0.62 |
| <b>Season (ref: Winter)</b>                                         |                      |               |                      |               |                      |               |
| Spring                                                              | 6.08**               | 2.38, 9.77    | 6.21**               | 2.40, 10.03   | 6.07**               | 2.26, 9.88    |
| Summer                                                              | 3.74                 | -0.11, 7.59   | 3.80                 | -0.17, 7.76   | 3.78                 | -0.19, 7.74   |
| Autumn                                                              | 4.25*                | 0.59, 7.91    | 4.67*                | 0.90, 8.44    | 4.59*                | 0.83, 8.36    |
| <b>Parity (ref: Nulliparous)</b>                                    |                      |               |                      |               |                      |               |
| Parous                                                              | -1.87                | -6.03, 2.30   | -1.05                | -5.27, 3.18   | -1.12                | -5.33, 3.08   |
| <b>Age</b>                                                          | -0.53*               | -0.97, -0.09  | -0.56*               | -1.01, -0.11  | -0.54*               | -0.99, -0.09  |
| <i>Random effects</i>                                               |                      |               |                      |               |                      |               |
| <b>Intra-class correlation (%) neighbourhood level</b>              | 0.7                  |               | 1.6                  |               | 1.1                  |               |
| <b>Intra-class correlation (%) individual level</b>                 | 40.0                 |               | 39.0                 |               | 38.5                 |               |

<sup>a</sup> Three-level linear mixed effects regression models

\* p<0.05

\*\* p<0.01
